# Supplementary material
Source: publisher figshare collection journal article supplement (https://karger.figshare.com/ndownloader/files/24193814)
Supplement: Supplementary file 1 [file 24193814]

Supplemental Figure Legend:

Flowchart showing the number of subjects that were tested for gait speed at each time point
